# Supplementary material for: Impact of wild prey availability on livestock predation by snow leopards
Source: R Soc Open Sci. 2017 Jun 7;4(6):170026. doi: 10.1098/rsos.170026 (PMC5493907; doi:10.1098/rsos.170026)
Supplement: Appendix C2: Data for functional response analysis [file rsos170026supp4.csv]

site	AreaMetres	Area	Snow leopard	lcl	ucl	Wild prey	WP density	95%CI	yak	dzo	dzomo	cow	horse	donkey	sheep	goat	Total livestock density
Lingti	240	4	8	7	10	593	2.470833333	46	116	1	12	32	19	115	43	120	458
Kibber	411	2	8	7	10	735	1.788321168	44	518	40	256	358	107	544	1369	702	3894
Tabo	341	7	4	4	4	509	1.492668622	53	50	196	368	205	67	206	918	785	2795
Pin	270	6	2	2	2	184	0.681481481	40	196	76	191	167	326	358	235	251	1800
Lossar	219	5	1	1	1	30	0.136986301	14	138	31	296	73	11	123	169	69	910
Gya-miru	300	3	5	4	8	404	1.346666667	114	0	0	0	323	303	22	2500	2712	5860
Tost	250	1	5	5	5	236	0.944	89	50	0	0	0	50	0	1300	1300	2700
